# Supplementary material for: Molecular Dynamics of Jelly Candies by Means of Nuclear Magnetic Resonance Relaxometry
Source: MDPI journal article supplement (doi:10.3390/molecules28052230), 2023-02-27
Supplement: s1 [file s1]

## Supplementary Materials

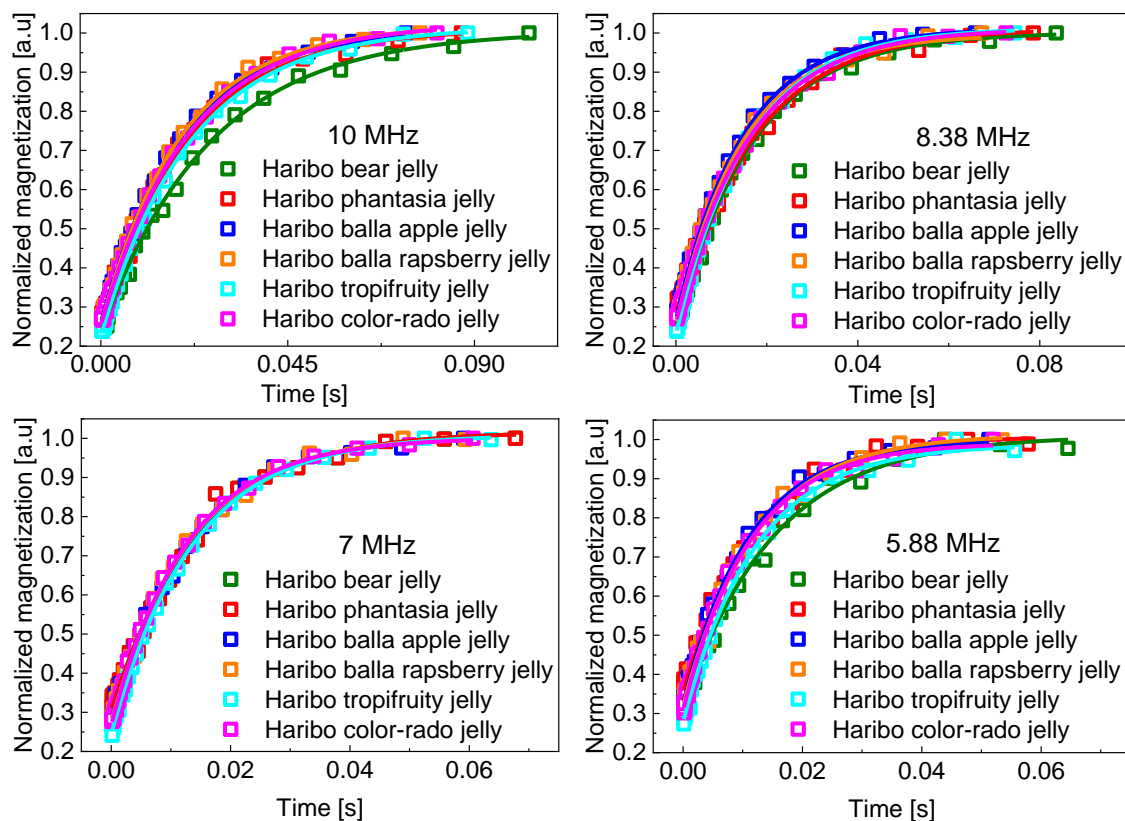

**Figure. S1.** Example of  $^1\text{H}$  magnetisation curves for different kinds of Haribo jelly at 298 K; solid lines – single exponential fits.

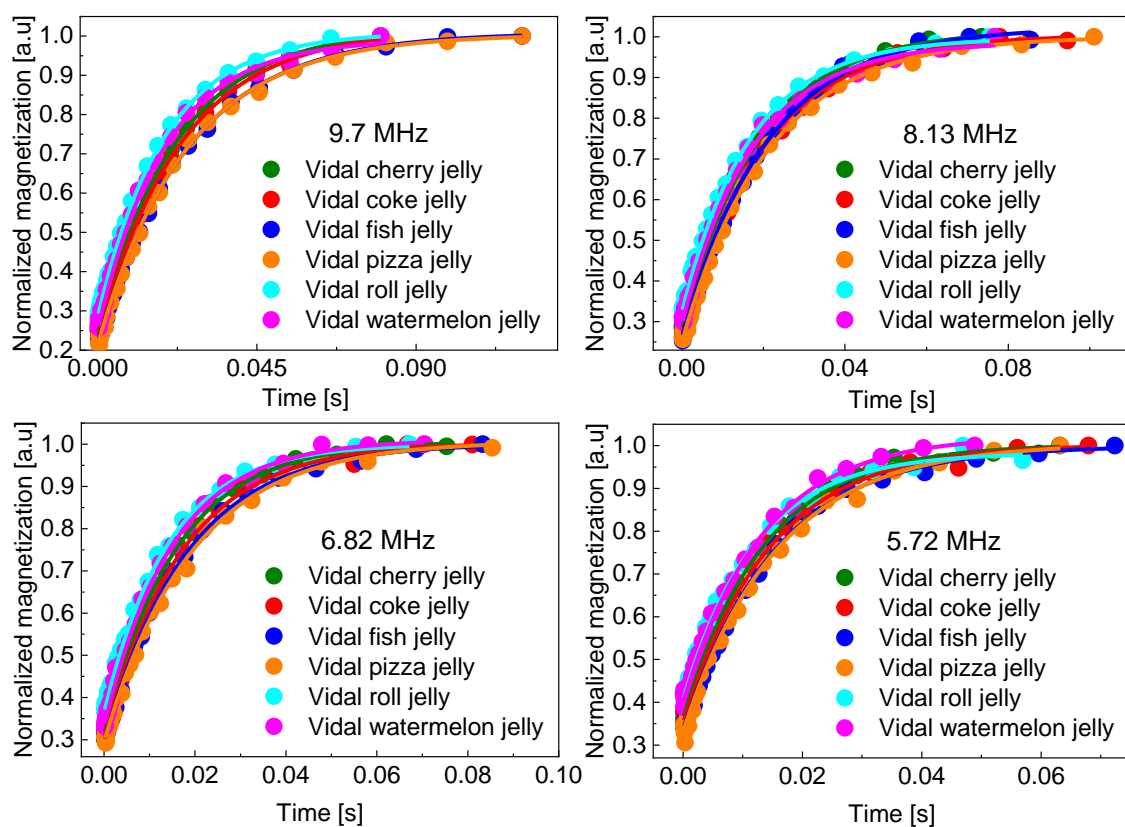

**Figure. S2.** Example of  $^1\text{H}$  magnetisation curves for different kinds of Vidal jelly at 323°K; solid lines – single exponential fits.

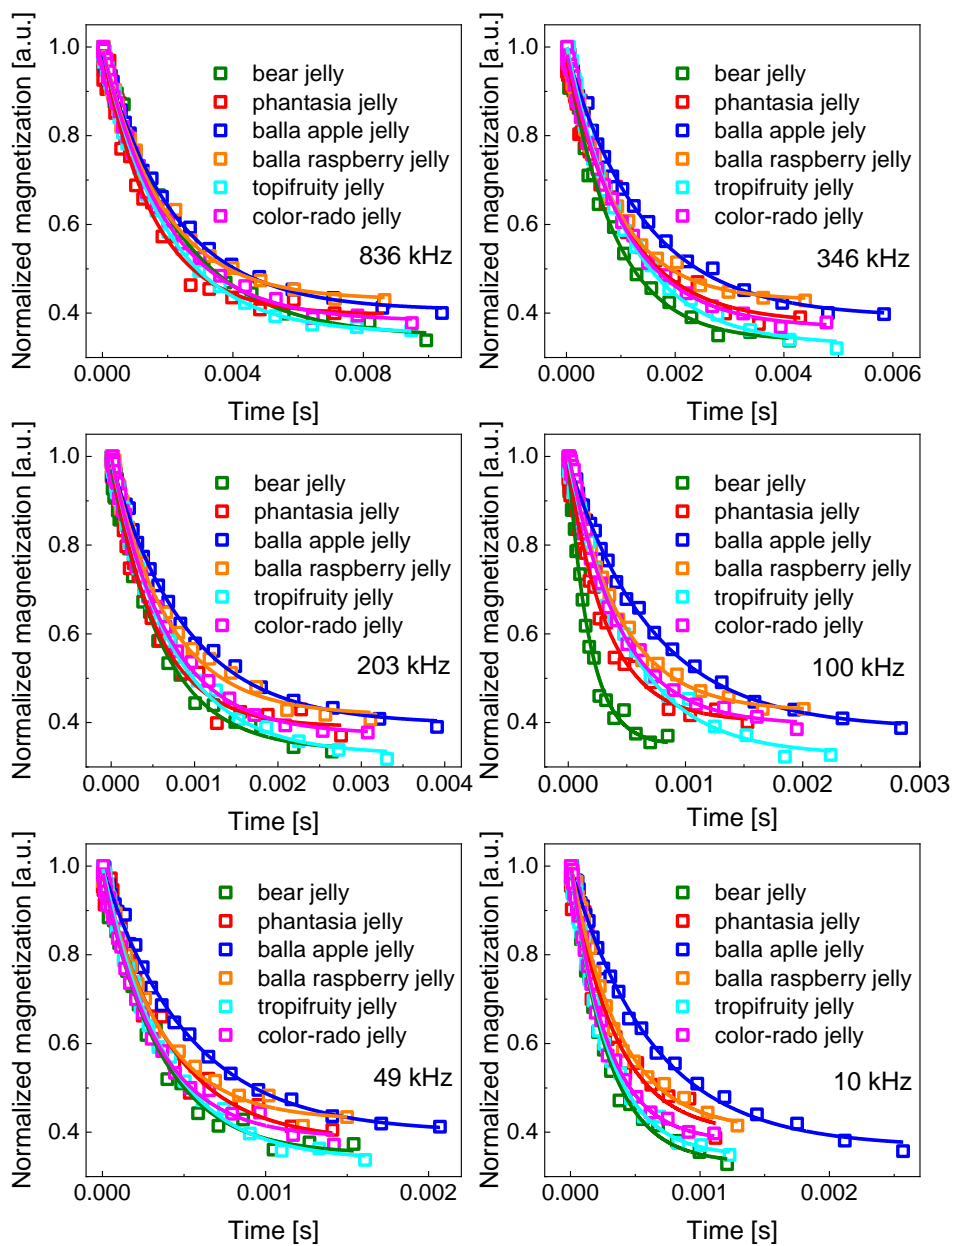

**Figure S3.** Example of  $^1\text{H}$  magnetisation curves for different kinds of Haribo jelly at 298 K; solid lines – single exponential fits.

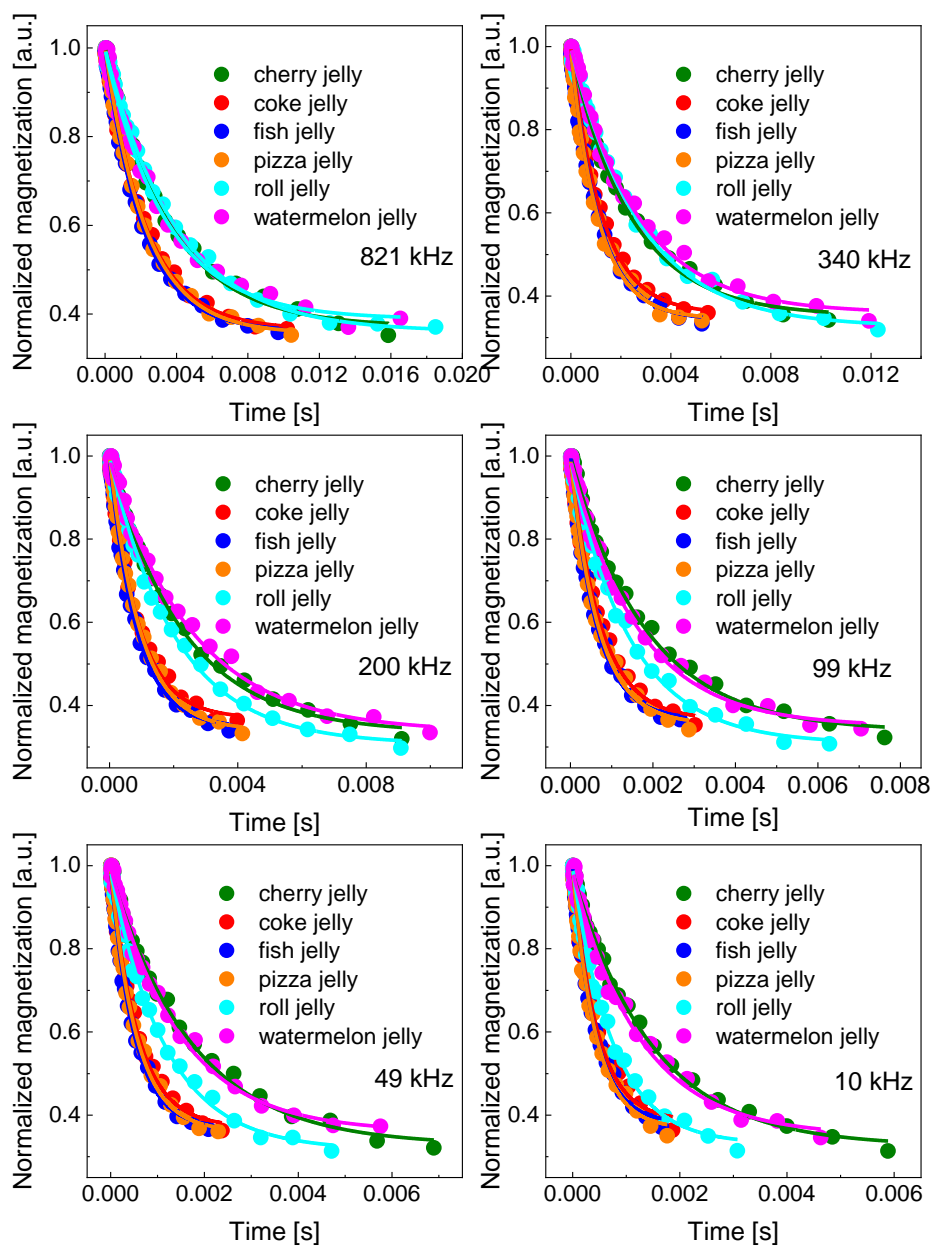

**Figure S4.** Example of  $^1\text{H}$  magnetisation curves for different kinds of Vidal jelly at  $323^\circ\text{K}$ ; solid lines – single exponential fits.
